# Supplementary material for: Mutant TDP-43 and FUS Cause Age-Dependent Paralysis and Neurodegeneration in C. elegans
Source: PubMed Central journal article supplement (PMC3283630; doi:10.1371/journal.pone.0031321), 2012-02-21
Supplement: pone.0031321.s001.pdf [file pone.0031321.s001.pdf]

## Tables

|                 | Strain        | Mean Lifespan | P value      | 75 <sup>th</sup> Percentile (Days) | Maximum Lifespan | Total Number of Animals Died/Total |
|-----------------|---------------|---------------|--------------|------------------------------------|------------------|------------------------------------|
| <b>Figure 4</b> | N2            | 18            |              | 22                                 | 26               | 98/112                             |
|                 | TDP-43 WT     | 18            | ns<br>0.6367 | 22                                 | 28               | 100/104                            |
|                 | TDP-43[A315T] | 18            | ns<br>0.0534 | 24                                 | 25               | 94/102                             |
|                 | N2            | 20            |              | 23                                 | 28               | 98/112                             |
|                 | FUS WT        | 21            | ns<br>0.4172 | 24                                 | 28               | 100/122                            |
|                 | FUS[S57Δ]     | 22            | ns<br>0.0890 | 24                                 | 30               | 96/124                             |

**Table S1, related to Figure 4. Lifespan analysis for all experiments.**

Animals that died prematurely (ruptured, internal hatching) or were lost (crawled off the plate) were censored at the time of scoring. All control and experimental animals were scored and transferred to new plates at the same time. ns: not significant
